# Supplementary material
Source: publisher figshare collection journal article supplement (https://acs.figshare.com/ndownloader/files/5159806)
Supplement: Supplementary file 1 [file 5159806]

**Supplementary Material for**  
**AN UNUSUAL ZWITTERIONIC, DIRADICAL INTERMEDIATE IN**  
**PHOTOCHEMICAL ELECTRON-TRANSFER SUBSTITUTION REACTIONS**

John B. Miller,<sup>\*,a</sup> Jeremy Breeding, and Thomas J. Smith<sup>b</sup>

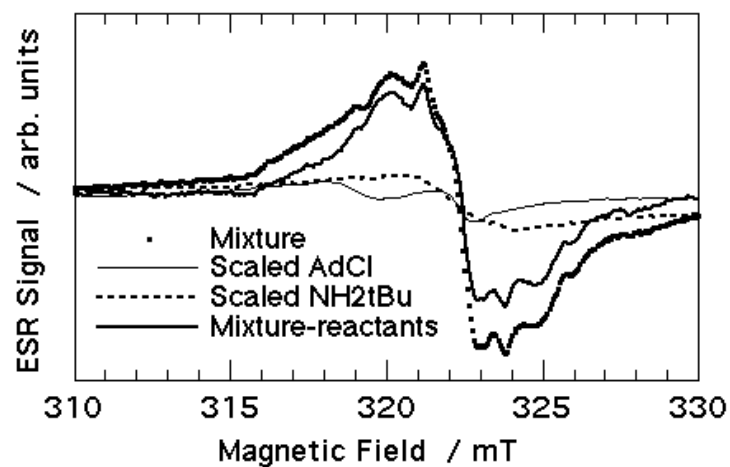

**Supplementary Figure 1.** Spectral subtraction of the ESR signals due to uncomplexed reactants from the spectrum of the mixture. Measured 1-chloroadamantane and *tert*-butylamine spectra were individually scaled so that the difference spectrum was at baseline below 314 mT and above 330 mT.

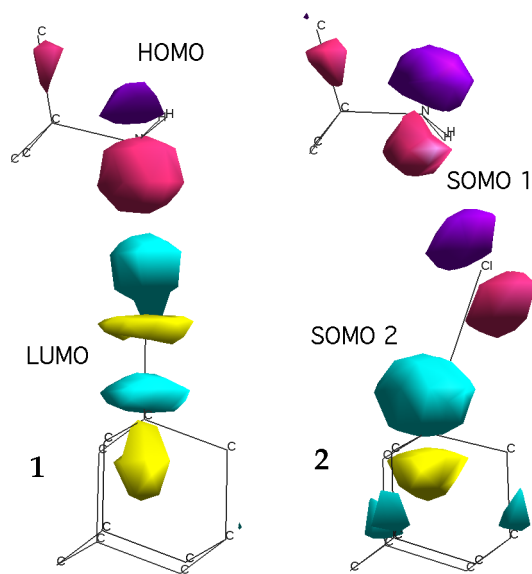

**Supplementary Figure 2.** Isosurfaces of the frontier molecular orbitals for complex **1** (left) and **2** (right).
